# Supplementary material for: Instrumental and Non-Instrumental Measurements in Patients with Peripheral Vestibular Dysfunctions
Source: MDPI journal article supplement (doi:10.3390/s23041994), 2023-02-10
Supplement: s1 [file s1]

| Color correlation matrix                               |          |          |              |              |          |          |               |               |           |           |                |                |            |            |               |               |          |          |          |          |           |          |          |         |
|--------------------------------------------------------|----------|----------|--------------|--------------|----------|----------|---------------|---------------|-----------|-----------|----------------|----------------|------------|------------|---------------|---------------|----------|----------|----------|----------|-----------|----------|----------|---------|
| N=40                                                   |          |          |              |              |          |          |               |               |           |           |                |                |            |            |               |               |          |          |          |          |           |          |          |         |
| r>= -1 -0,80 -0,60 -0,40 -0,20 0 0,20 0,40 0,60 0,80 1 |          |          |              |              |          |          |               |               |           |           |                |                |            |            |               |               |          |          |          |          |           |          |          |         |
| Variable                                               | LEN-O 2  | LEN-C 2  | LEN-O FOAM 2 | LEN-C FOAM 2 | SURF-O 2 | SURF-C 2 | SURF-O FOAM 2 | SURF-C FOAM 2 | MAXAV-O 2 | MAXAV-C 2 | MAXAV-O FOAM 2 | MAXAV-C FOAM 2 | MeanAV-O 2 | MeanAV-C 2 | Mean-O FOAM 2 | Mean-C FOAM 2 | VSS 2    | DHI 2    | DGI 2    | BBS 2    | Tinetti 2 | FR 2     | TUG 2    |         |
| LEN-O                                                  | 0,60590  | 0,53028  | 0,22264      | 0,16703      | 0,63699  | 0,58884  | 0,09385       | 0,36479       | 0,08710   | 0,28443   | -0,00545       | 0,33630        | 0,59083    | 0,53567    | 0,18409       | 0,26040       | 0,28342  | 0,21031  | -0,47762 | -0,39304 | -0,64210  | -0,14258 | 0,22632  |         |
| LEN-C                                                  | 0,39552  | 0,53600  | 0,15609      | 0,32900      | 0,42958  | 0,60079  | 0,15793       | 0,49513       | 0,18742   | 0,32121   | 0,04609        | 0,46109        | 0,37073    | 0,52835    | 0,15318       | 0,40703       | 0,42108  | 0,24163  | -0,25439 | -0,28287 | -0,57372  | -0,03336 | 0,02737  |         |
| LEN-O FOAM                                             | 0,53366  | 0,46130  | 0,57318      | 0,29650      | 0,48829  | 0,56246  | 0,49954       | 0,59476       | 0,13864   | 0,25202   | 0,35847        | 0,57161        | 0,50015    | 0,45283    | 0,56068       | 0,58574       | 0,24481  | 0,31566  | -0,55150 | -0,52926 | -0,77683  | -0,31487 | 0,18278  |         |
| LEN-C FOAM                                             | -0,04819 | 0,14803  | 0,12756      | 0,30954      | -0,05917 | 0,05987  | 0,19050       | 0,14586       | -0,09674  | 0,23310   | 0,08115        | 0,20037        | -0,05439   | 0,14123    | 0,14214       | 0,28984       | -0,06567 | 0,03375  | 0,06929  | 0,06095  | 0,09305   | -0,07093 | 0,14395  |         |
| SURF-O                                                 | 0,49914  | 0,46410  | 0,12911      | 0,14172      | 0,59922  | 0,61863  | 0,02269       | 0,41228       | 0,15954   | 0,28475   | -0,00241       | 0,30274        | 0,50002    | 0,47508    | 0,10065       | 0,23044       | 0,27451  | 0,20094  | -0,45280 | -0,31908 | -0,59879  | -0,10896 | 0,20214  |         |
| SURF-C                                                 | 0,29837  | 0,36681  | 0,05347      | 0,26336      | 0,36676  | 0,52096  | 0,02164       | 0,43842       | 0,51557   | 0,20957   | 0,23129        | 0,05040        | 0,43842    | 0,28952    | 0,36774       | 0,04845       | 0,34926  | 0,35394  | 0,22051  | -0,29252 | -0,25571  | -0,56570 | -0,03592 | 0,01444 |
| SURF-O FOAM                                            | 0,44203  | 0,42869  | 0,44346      | 0,21575      | 0,42386  | 0,59522  | 0,43562       | 0,55600       | 0,14679   | 0,23960   | 0,33419        | 0,50828        | 0,41703    | 0,42126    | 0,44364       | 0,48118       | 0,20978  | 0,25064  | -0,43538 | -0,37638 | -0,68823  | -0,18820 | 0,10064  |         |
| SURF-C FOAM                                            | -0,11146 | 0,07765  | -0,03156     | 0,15237      | -0,05166 | 0,02506  | 0,02042       | 0,07635       | -0,20982  | 0,22896   | 0,02747        | 0,14596        | -0,11601   | 0,07571    | -0,02103      | 0,17278       | -0,21868 | -0,15898 | 0,02297  | 0,04800  | 0,05406   | -0,12335 | 0,18877  |         |
| MAXAV-O                                                | 0,16260  | 0,21393  | -0,09331     | 0,01579      | 0,25950  | 0,31546  | -0,14636      | 0,16403       | -0,07640  | 0,12384   | -0,01054       | 0,17166        | 0,20791    | 0,23931    | -0,10177      | 0,11986       | 0,14755  | 0,19130  | -0,18280 | -0,02692 | -0,19842  | 0,02199  | 0,11258  |         |
| MAXAV-C                                                | 0,29733  | 0,39215  | 0,02187      | 0,35362      | 0,31879  | 0,50977  | 0,02062       | 0,51910       | 0,26846   | 0,28949   | -0,03203       | 0,48427        | 0,29058    | 0,39070    | 0,02301       | 0,40099       | 0,40148  | 0,21569  | -0,16669 | -0,17108 | -0,46058  | 0,04089  | -0,03076 |         |
| MAXO-FOAM                                              | 0,58491  | 0,49798  | 0,48253      | 0,14294      | 0,56951  | 0,63683  | 0,50416       | 0,48003       | 0,20654   | 0,27202   | 0,26199        | 0,42695        | 0,56261    | 0,49422    | 0,50551       | 0,45970       | 0,30121  | 0,36650  | -0,47892 | -0,42098 | -0,69023  | -0,25068 | 0,18437  |         |
| MAX-C FOAM                                             | 0,15038  | 0,34429  | 0,19243      | 0,38939      | 0,13318  | 0,34753  | 0,22034       | 0,45450       | -0,09179  | 0,37067   | 0,11708        | 0,52247        | 0,16593    | 0,34482    | 0,20954       | 0,52171       | 0,10407  | 0,20256  | -0,15236 | -0,10648 | -0,22305  | -0,15194 | 0,18561  |         |
| MeanAV-O                                               | 0,58675  | 0,44807  | 0,17842      | 0,06073      | 0,61243  | 0,50165  | 0,04967       | 0,26298       | 0,09347   | 0,29856   | -0,08394       | 0,23970        | 0,60876    | 0,46725    | 0,14241       | 0,18788       | 0,28446  | 0,21028  | -0,46443 | -0,35663 | -0,53070  | -0,17345 | 0,27465  |         |
| MeanAV-C                                               | 0,40654  | 0,52733  | 0,14463      | 0,32869      | 0,44497  | 0,61320  | 0,14083       | 0,51923       | 0,19402   | 0,31573   | 0,04697        | 0,47329        | 0,38841    | 0,52331    | 0,14379       | 0,45108       | 0,43206  | 0,26986  | -0,26923 | -0,27982 | -0,57672  | -0,03890 | 0,04491  |         |
| MEAN-O-FOAM                                            | 0,54043  | 0,45865  | 0,53403      | 0,23926      | 0,51240  | 0,60403  | 0,48787       | 0,58205       | 0,15843   | 0,25737   | 0,34059        | 0,53838        | 0,51751    | 0,45461    | 0,53542       | 0,54432       | 0,25897  | 0,31121  | -0,54567 | -0,49302 | -0,76398  | -0,29379 | 0,20238  |         |
| MEAN-C-FOAM                                            | 0,17185  | 0,31318  | 0,23821      | 0,38571      | 0,13588  | 0,24266  | 0,28342       | 0,37209       | -0,05371  | 0,28948   | 0,14192        | 0,45527        | 0,16843    | 0,31058    | 0,26048       | 0,52871       | 0,04243  | 0,16380  | -0,18021 | -0,16352 | -0,21209  | -0,20336 | 0,21904  |         |
| VSS 1                                                  | -0,25822 | -0,18876 | -0,23032     | -0,07606     | -0,23643 | -0,12548 | -0,23508      | -0,04262      | 0,01937   | -0,24755  | -0,20358       | -0,11284       | -0,24067   | -0,16738   | -0,22214      | -0,12275      | 0,46152  | 0,23942  | 0,18159  | 0,11997  | 0,06862   | 0,01450  | -0,15238 |         |
| DHI 1                                                  | -0,22754 | -0,23557 | -0,16849     | 0,05243      | -0,24204 | -0,17117 | -0,21379      | -0,00911      | 0,08280   | -0,06626  | -0,09796       | -0,00025       | -0,20715   | -0,22806   | -0,15963      | -0,05023      | 0,26578  | 0,30971  | 0,18515  | 0,15173  | 0,11027   | 0,08622  | -0,23682 |         |
| DGI 1                                                  | -0,40867 | -0,34688 | -0,40823     | -0,25433     | -0,43027 | -0,33678 | -0,29267      | -0,45924      | -0,08926  | -0,21147  | -0,14246       | -0,24822       | -0,39338   | -0,34428   | -0,42131      | -0,40497      | -0,12864 | -0,27380 | 0,62377  | 0,67617  | 0,64785   | 0,55062  | -0,60229 |         |
| BBS 1                                                  | -0,48366 | -0,28186 | -0,44950     | -0,15870     | -0,48888 | -0,33794 | -0,32479      | -0,46082      | -0,16676  | -0,15295  | -0,19257       | -0,23901       | -0,50349   | -0,29123   | -0,47377      | -0,36971      | -0,26732 | -0,33127 | 0,71286  | 0,73460  | 0,75603   | 0,57940  | -0,55719 |         |
| Tinetti 1                                              | -0,38909 | -0,37395 | -0,47613     | -0,28408     | -0,40902 | -0,43163 | -0,32088      | -0,52203      | -0,08415  | -0,34691  | -0,16998       | -0,32363       | -0,37125   | -0,36841   | -0,46880      | -0,43911      | -0,25580 | -0,28427 | 0,54847  | 0,61243  | 0,73014   | 0,39893  | -0,37251 |         |
| FR 1                                                   | -0,45402 | -0,17204 | -0,22742     | -0,01511     | -0,42997 | -0,23098 | -0,14403      | -0,25781      | -0,28241  | -0,01784  | -0,01003       | -0,15401       | -0,50491   | -0,19911   | -0,26232      | -0,22514      | -0,25894 | -0,36860 | 0,67478  | 0,60061  | 0,59899   | 0,43299  | -0,51393 |         |
| TUG 1                                                  | 0,25698  | 0,16601  | 0,10084      | 0,09170      | 0,26690  | 0,22448  | -0,03002      | 0,38183       | 0,20308   | 0,35902   | -0,12197       | 0,27452        | 0,29460    | 0,18952    | 0,11021       | 0,28875       | 0,02190  | 0,28415  | -0,46133 | -0,45896 | -0,46244  | -0,36657 | 0,41573  |         |

|             | Color map of p value for correlation coefficient            |         |              |              |          |          |               |               |           |           |                |                |            |            |               |               |       |       |       |       |           |       |       |
|-------------|-------------------------------------------------------------|---------|--------------|--------------|----------|----------|---------------|---------------|-----------|-----------|----------------|----------------|------------|------------|---------------|---------------|-------|-------|-------|-------|-----------|-------|-------|
|             | N=40                                                        |         |              |              |          |          |               |               |           |           |                |                |            |            |               |               |       |       |       |       |           |       |       |
|             | p<= 0,001 0,010 0,025 0,050 0,100 0,150 0,200 0,350 0,500 1 |         |              |              |          |          |               |               |           |           |                |                |            |            |               |               |       |       |       |       |           |       |       |
| Variable    | LEN-O 2                                                     | LEN-C 2 | LEN-O FOAM 2 | LEN-C FOAM 2 | SURF-O 2 | SURF-C 2 | SURF-O FOAM 2 | SURF-C FOAM 2 | MAXAV-O 2 | MAXAV-C 2 | MAXAV-O FOAM 2 | MAXAV-C FOAM 2 | MeanAV-O 2 | MeanAV-C 2 | Mean-O FOAM 2 | Mean-C FOAM 2 | VSS 2 | DHI 2 | DGI 2 | BBS 2 | Tinetti 2 | FR 2  | TUG 2 |
| LEN-O       | 0,000                                                       | 0,000   | 0,167        | 0,303        | 0,000    | 0,000    | 0,565         | 0,021         | 0,593     | 0,075     | 0,973          | 0,034          | 0,000      | 0,000      | 0,255         | 0,105         | 0,076 | 0,193 | 0,002 | 0,012 | 0,000     | 0,380 | 0,160 |
| LEN-C       | 0,012                                                       | 0,000   | 0,336        | 0,038        | 0,006    | 0,000    | 0,330         | 0,001         | 0,247     | 0,043     | 0,778          | 0,003          | 0,019      | 0,000      | 0,345         | 0,009         | 0,007 | 0,133 | 0,113 | 0,077 | 0,000     | 0,838 | 0,867 |
| LEN-O FOAM  | 0,000                                                       | 0,003   | 0,000        | 0,063        | 0,001    | 0,000    | 0,001         | 0,000         | 0,394     | 0,117     | 0,023          | 0,000          | 0,001      | 0,003      | 0,000         | 0,000         | 0,128 | 0,047 | 0,000 | 0,000 | 0,000     | 0,048 | 0,259 |
| LEN-C FOAM  | 0,768                                                       | 0,362   | 0,433        | 0,052        | 0,717    | 0,714    | 0,239         | 0,369         | 0,553     | 0,148     | 0,619          | 0,215          | 0,739      | 0,385      | 0,382         | 0,070         | 0,687 | 0,836 | 0,671 | 0,709 | 0,568     | 0,664 | 0,375 |
| SURF-O      | 0,001                                                       | 0,003   | 0,427        | 0,383        | 0,000    | 0,000    | 0,889         | 0,008         | 0,325     | 0,075     | 0,988          | 0,058          | 0,001      | 0,002      | 0,537         | 0,153         | 0,086 | 0,214 | 0,003 | 0,045 | 0,000     | 0,503 | 0,211 |
| SURF-C      | 0,061                                                       | 0,020   | 0,743        | 0,101        | 0,020    | 0,001    | 0,895         | 0,001         | 0,194     | 0,151     | 0,757          | 0,005          | 0,070      | 0,020      | 0,767         | 0,027         | 0,025 | 0,172 | 0,067 | 0,111 | 0,000     | 0,826 | 0,930 |
| SURF-O FOAM | 0,004                                                       | 0,006   | 0,004        | 0,181        | 0,006    | 0,000    | 0,005         | 0,000         | 0,366     | 0,136     | 0,035          | 0,001          | 0,007      | 0,007      | 0,004         | 0,002         | 0,194 | 0,119 | 0,005 | 0,017 | 0,000     | 0,245 | 0,537 |
| SURF-C FOAM | 0,494                                                       | 0,634   | 0,847        | 0,348        | 0,752    | 0,878    | 0,900         | 0,640         | 0,194     | 0,155     | 0,866          | 0,369          | 0,476      | 0,642      | 0,897         | 0,286         | 0,175 | 0,327 | 0,888 | 0,769 | 0,740     | 0,448 | 0,243 |
| MAXAV-O     | 0,316                                                       | 0,185   | 0,567        | 0,923        | 0,106    | 0,047    | 0,367         | 0,312         | 0,639     | 0,446     | 0,949          | 0,290          | 0,198      | 0,137      | 0,532         | 0,461         | 0,364 | 0,237 | 0,259 | 0,869 | 0,220     | 0,893 | 0,489 |
| MAXAV-C     | 0,062                                                       | 0,012   | 0,893        | 0,025        | 0,045    | 0,001    | 0,899         | 0,001         | 0,094     | 0,070     | 0,844          | 0,002          | 0,069      | 0,013      | 0,888         | 0,010         | 0,010 | 0,181 | 0,304 | 0,291 | 0,003     | 0,802 | 0,851 |
| MAXO-FOAM   | 0,000                                                       | 0,001   | 0,002        | 0,379        | 0,000    | 0,000    | 0,001         | 0,002         | 0,201     | 0,089     | 0,102          | 0,006          | 0,000      | 0,001      | 0,001         | 0,003         | 0,059 | 0,020 | 0,002 | 0,007 | 0,000     | 0,119 | 0,255 |
| MAX-C FOAM  | 0,354                                                       | 0,030   | 0,234        | 0,013        | 0,413    | 0,028    | 0,172         | 0,003         | 0,573     | 0,019     | 0,472          | 0,001          | 0,337      | 0,029      | 0,194         | 0,001         | 0,523 | 0,210 | 0,348 | 0,513 | 0,167     | 0,349 | 0,252 |
| MeanAV-O    | 0,000                                                       | 0,004   | 0,271        | 0,710        | 0,000    | 0,001    | 0,761         | 0,101         | 0,566     | 0,061     | 0,607          | 0,136          | 0,000      | 0,002      | 0,381         | 0,246         | 0,075 | 0,193 | 0,003 | 0,024 | 0,000     | 0,284 | 0,086 |
| MeanAV-C    | 0,009                                                       | 0,000   | 0,373        | 0,038        | 0,004    | 0,000    | 0,386         | 0,001         | 0,230     | 0,047     | 0,773          | 0,002          | 0,013      | 0,001      | 0,376         | 0,008         | 0,005 | 0,092 | 0,093 | 0,086 | 0,000     | 0,812 | 0,783 |
| MEAN-O FOAM | 0,000                                                       | 0,003   | 0,000        | 0,137        | 0,001    | 0,000    | 0,001         | 0,000         | 0,329     | 0,109     | 0,032          | 0,000          | 0,001      | 0,003      | 0,000         | 0,000         | 0,107 | 0,037 | 0,000 | 0,001 | 0,000     | 0,066 | 0,210 |
| MEAN-C FOAM | 0,289                                                       | 0,049   | 0,139        | 0,014        | 0,403    | 0,131    | 0,076         | 0,018         | 0,742     | 0,070     | 0,382          | 0,003          | 0,299      | 0,051      | 0,105         | 0,000         | 0,795 | 0,313 | 0,266 | 0,313 | 0,189     | 0,208 | 0,174 |
| VSS 1       | 0,108                                                       | 0,243   | 0,153        | 0,641        | 0,142    | 0,440    | 0,144         | 0,794         | 0,906     | 0,124     | 0,208          | 0,488          | 0,135      | 0,247      | 0,168         | 0,450         | 0,003 | 0,137 | 0,262 | 0,461 | 0,674     | 0,929 | 0,348 |
| DHI 1       | 0,158                                                       | 0,143   | 0,299        | 0,748        | 0,132    | 0,291    | 0,185         | 0,955         | 0,611     | 0,132     | 0,548          | 0,999          | 0,200      | 0,157      | 0,325         | 0,758         | 0,097 | 0,052 | 0,253 | 0,350 | 0,498     | 0,685 | 0,141 |
| DGI 1       | 0,009                                                       | 0,028   | 0,009        | 0,113        | 0,006    | 0,034    | 0,067         | 0,003         | 0,584     | 0,190     | 0,381          | 0,122          | 0,012      | 0,030      | 0,007         | 0,010         | 0,429 | 0,087 | 0,000 | 0,000 | 0,000     | 0,000 | 0,000 |
| BBS 1       | 0,002                                                       | 0,078   | 0,004        | 0,328        | 0,001    | 0,034    | 0,003         | 0,304         | 0,041     | 0,033     | 0,234          | 0,137          | 0,001      | 0,068      | 0,002         | 0,019         | 0,095 | 0,037 | 0,000 | 0,000 | 0,000     | 0,000 | 0,000 |
| Tinetti 1   | 0,013                                                       | 0,017   | 0,002        | 0,076        | 0,009    | 0,005    | 0,044         | 0,001         | 0,606     | 0,028     | 0,294          | 0,042          | 0,018      | 0,019      | 0,002         | 0,005         | 0,111 | 0,075 | 0,000 | 0,000 | 0,000     | 0,011 | 0,018 |
| FR 1        | 0,003                                                       | 0,288   | 0,158        | 0,926        | 0,006    | 0,152    | 0,375         | 0,108         | 0,077     | 0,913     | 0,951          | 0,343          | 0,001      | 0,218      | 0,102         | 0,162         | 0,107 | 0,019 | 0,000 | 0,000 | 0,000     | 0,005 | 0,001 |
| TUG 1       | 0,109                                                       | 0,306   | 0,536        | 0,574        | 0,096    | 0,164    | 0,854         | 0,015         | 0,209     | 0,023     | 0,453          | 0,086          | 0,065      | 0,241      | 0,498         | 0,071         | 0,893 | 0,076 | 0,003 | 0,003 | 0,003     | 0,020 | 0,000 |
